# Supplementary material
Source: PubMed Central journal article supplement (PMC2098803)

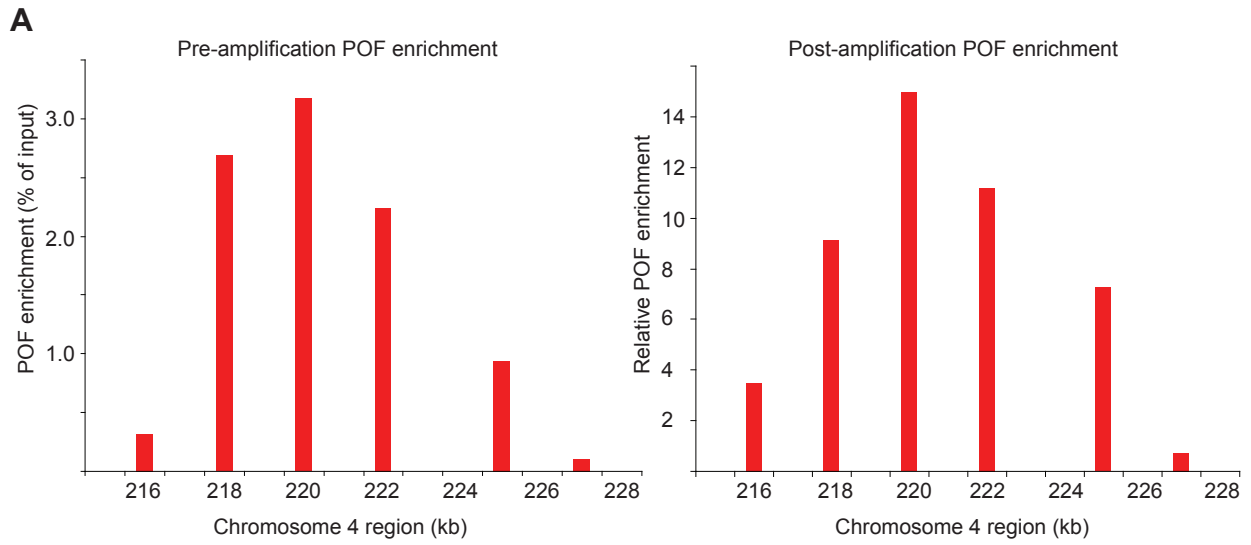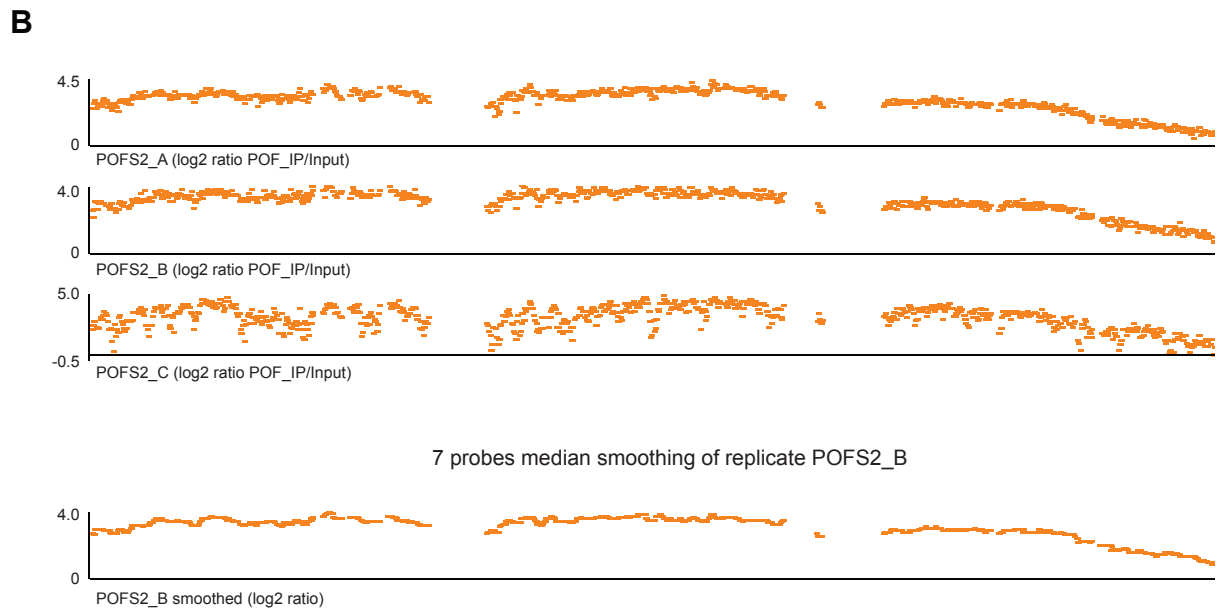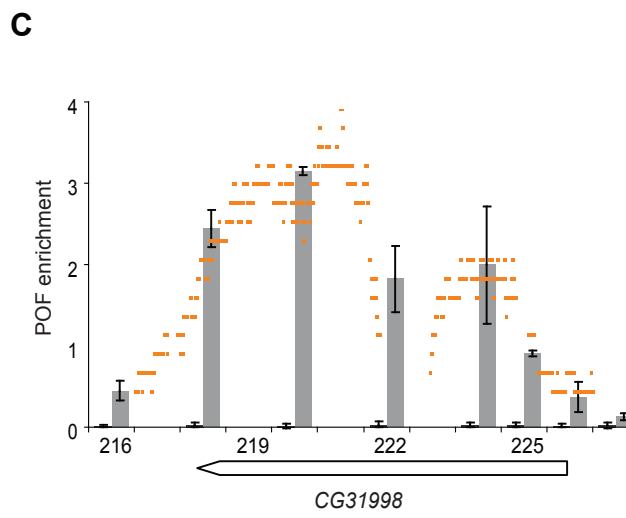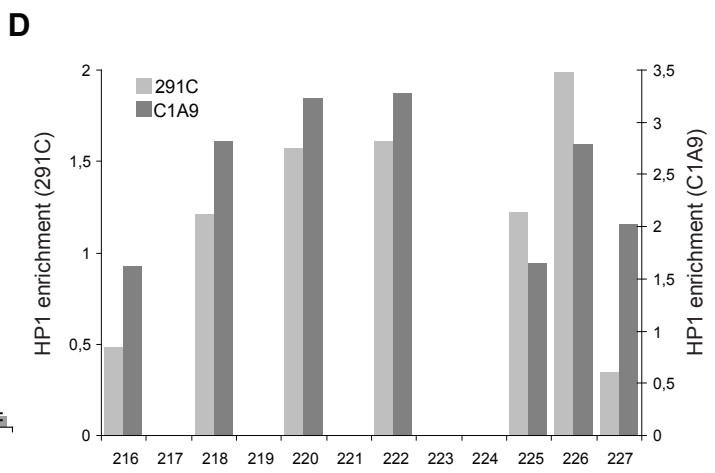

Supplement: pgen.0030209.sg001.pdf [file pgen.0030209.sg001.pdf]

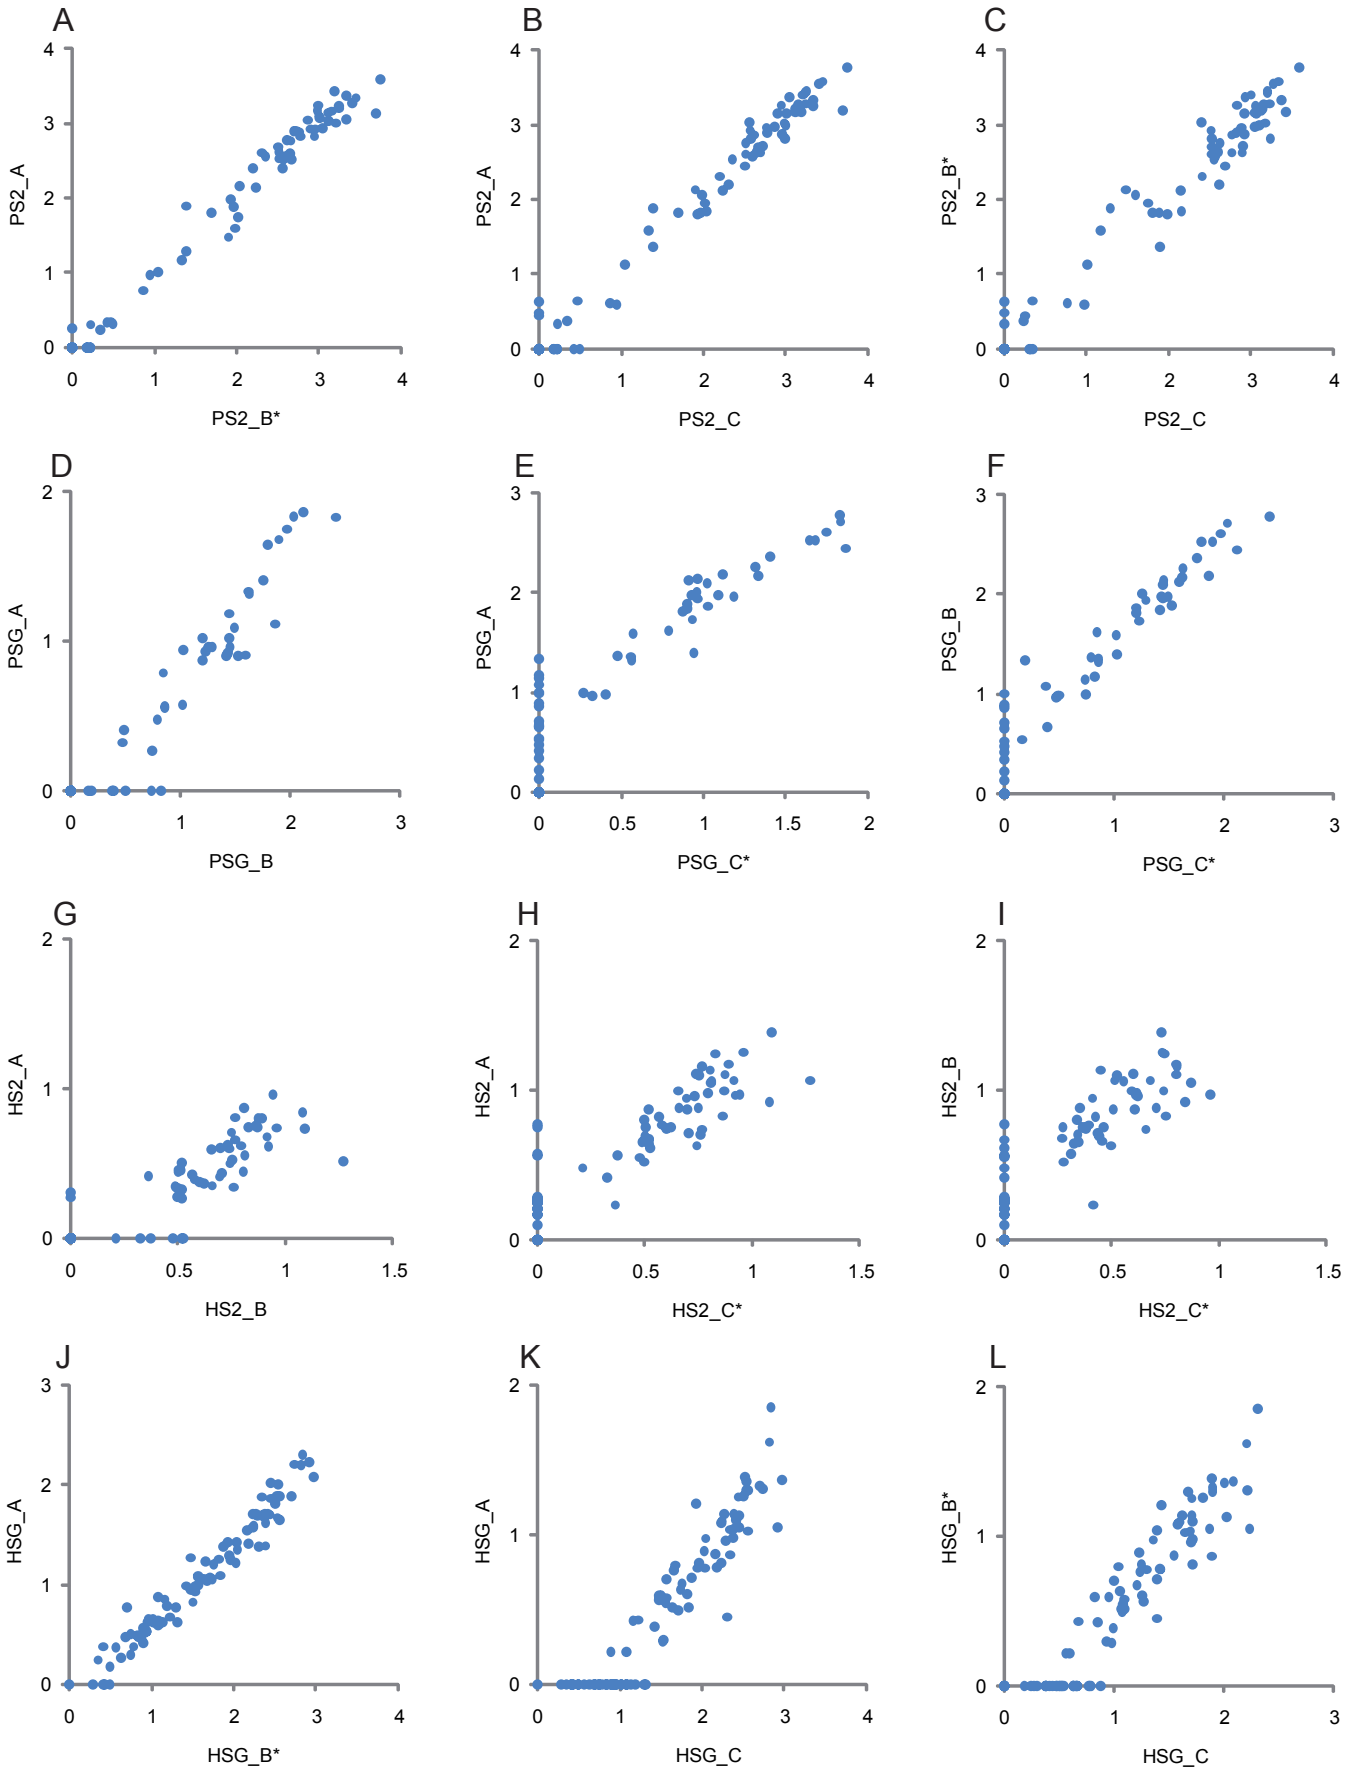

Supplement: pgen.0030209.sg002.pdf [file pgen.0030209.sg002.pdf]

Johansson\_FigS3

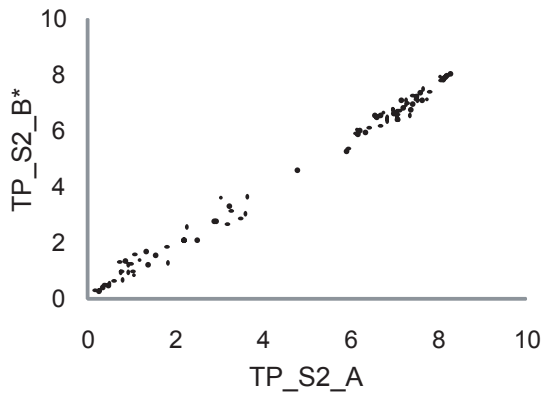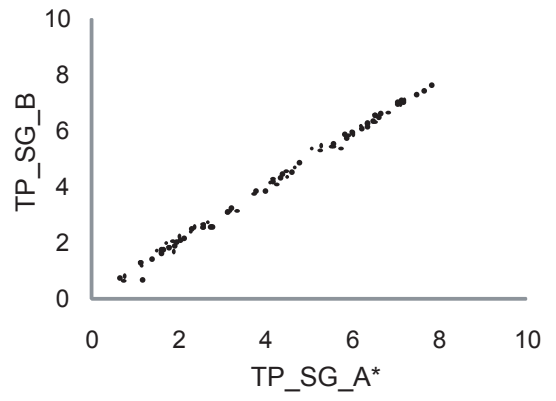

Supplement: pgen.0030209.sg003.pdf [file pgen.0030209.sg003.pdf]

Johansson\_FigS4

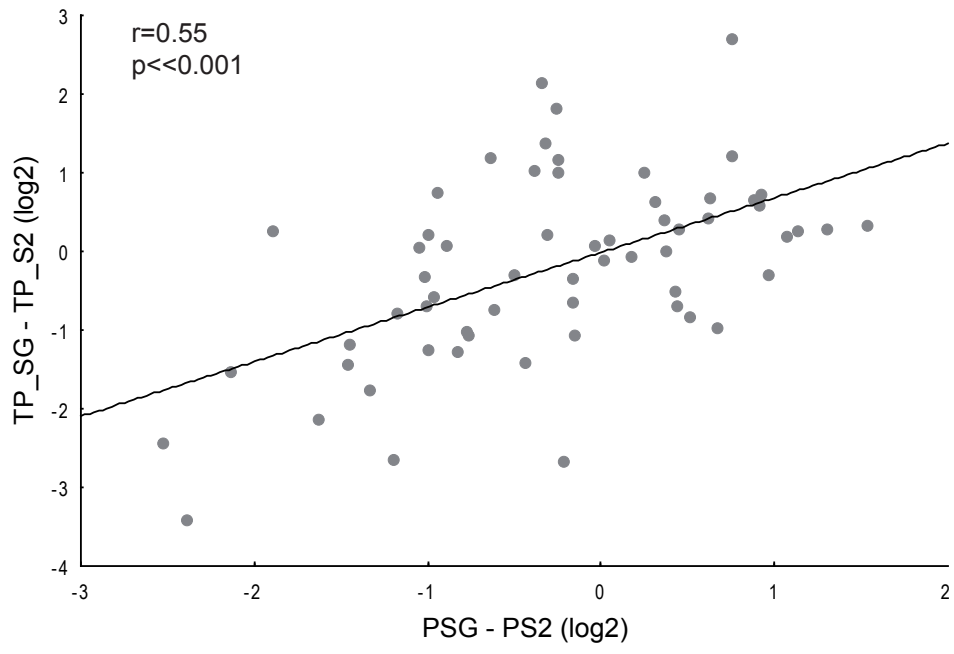

Supplement: pgen.0030209.sg004.pdf [file pgen.0030209.sg004.pdf]
